# Supplementary material for: 社長および各界リーダーのインタビュー・サーベイ(25) : セコム社長,日本金属工業社長,三菱総研相談役,大阪商船三井社長,デンソー社長,アイワ会長,島忠社長,小田急電鉄社長,国分社長,ヤマハ社長,昭和電工社長
Source: Royal Society of Chemistry journal article supplement (doi:10.1039/c7sm01375b), 1997-08-25
Supplement: c7sm01375b2.pdf [file c7sm01375b2.pdf]

# Supplementary information: Acceleration and suppression of banana-shaped-protein-induced tubulation by addition of small membrane inclusions of isotropic spontaneous curvatures

Hiroshi Noguchi

*Institute for Solid State Physics, University of Tokyo, Kashiwa,  
Chiba 277-8581, Japan. e-mail: noguchi@issp.u-tokyo.ac.jp*

## SUPPLEMENTAL FIGURES

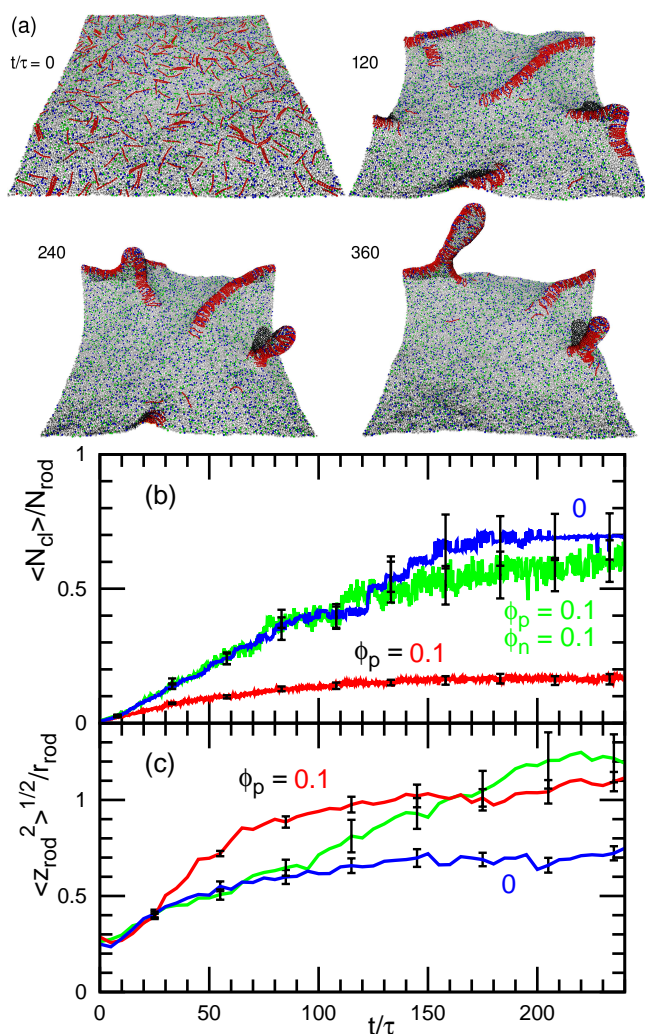

FIG. S.1. Rod assembly at  $\phi_{rod} = 0.1$ ,  $C_{rod} = C_p = -C_n = 3/r_{rod}$ , and  $\gamma = 0$ . (a) Sequential snapshots at  $t/\tau = 0, 120, 240$ , and  $360$  for  $\phi_p = \phi_n = 0.1$ . Two tubules protrude from the branching points of the rod clusters. (b),(c) Time development of (b) mean cluster size  $\langle N_{cl} \rangle$  and (c) vertical rod span  $\langle z_{rod}^2 \rangle^{1/2}$ . The vertical span of the rod assembly is calculated from the height variance as  $z_{rod}^2 = \sum_{i \in rod} (z_i - z_{rG})^2 / N_{rod}$  where  $z_{rG} = \sum_{i \in rod} z_i / N_{rod}$ .

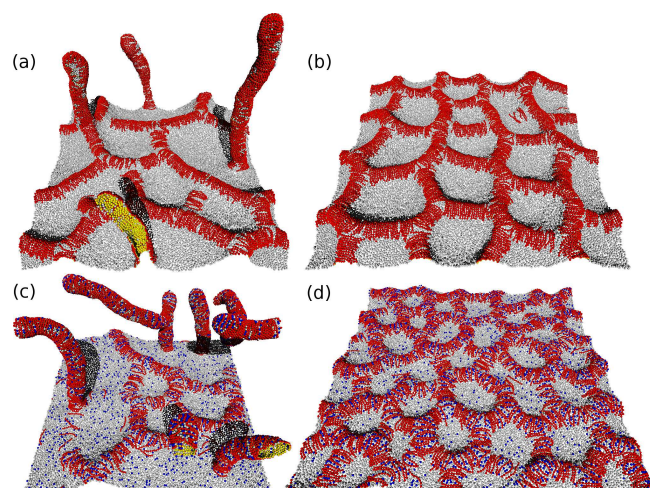

FIG. S.2. Snapshots of the membrane under positive surface tension at  $\phi_{rod} = 0.4$  and  $C_{rod} = C_p = 3/r_{rod}$ . (a)  $\phi_p = 0$  and  $\gamma r_{rod}^2 / k_B T = 6.25$ . (b)  $\phi_p = 0$  and  $\gamma r_{rod}^2 / k_B T = 12.5$ . (c)  $\phi_p = 0.1$  and  $\gamma r_{rod}^2 / k_B T = 12.5$ . (d)  $\phi_p = 0.1$  and  $\gamma r_{rod}^2 / k_B T = 25$ .

## MOVIE CAPTIONS

Movie S1: Tubulation from a flat membrane at  $\phi_{rod} = 0.1$ ,  $\phi_p = 0.1$ ,  $C_{rod} r_{rod} = 3$ ,  $C_p r_{rod} = 3$ , and  $\gamma = 0$ .

Movie S2: Tubulation from a budded membrane at  $\phi_{rod} = 0.1$ ,  $\phi_p = 0.1$ ,  $C_{rod} r_{rod} = 3$ ,  $C_p r_{rod} = 1$ , and  $\gamma = 0$ . The membrane shown in Fig. 1(e) is used as the initial budded state.

Movie S3: Tubulation from a flat membrane at  $\phi_{rod} = 0.4$ ,  $\phi_p = 0$ ,  $C_{rod} r_{rod} = 3$ , and  $\gamma = 0$ .

Movie S4: Tubulation from a flat membrane at  $\phi_{rod} = 0.4$ ,  $\phi_p = 0.1$ ,  $C_{rod} r_{rod} = 3$ ,  $C_p r_{rod} = 3$ , and  $\gamma = 0$ .

Movie S5: Tubulation from a flat membrane at  $\phi_{rod} = 0.4$ ,  $\phi_p = 0.1$ ,  $\phi_n = 0.1$ ,  $C_{rod} r_{rod} = 2$ ,  $C_p r_{rod} = 3$ ,  $C_n r_{rod} = -3$ , and  $\gamma = 0$ .

Movie S6: Tubule formation from a vesicle at  $\phi_{rod} = 0.1$ ,  $\phi_p = 0.1$ ,  $C_{rod} r_{rod} = 3$ , and  $C_p r_{rod} = 3$ .
